# Supplementary material for: The relationship between inequitable gender norms and provider attitudes and quality of care in maternal health services in Rwanda: a mixed methods study
Source: Springer Nature journal article supplement (doi:10.1186/s12884-021-03592-0), 2021-02-22
Supplement: MOESM1 [file 18895378]

**Study Title: Understanding gender and quality of care for RMNH services in Rwanda: a mixed methods study in three districts**

**Thank you for taking the time to complete this survey. Please mark your responses visibly inside the boxes.**

**By completing this survey you indicate your consent to participate in this study, and have completed a consent form provided to you along with this survey.**

**After completing the survey, place it in the envelope provided and seal the envelope. The survey will be collected by a representative of Jhpiego/MCSP Rwanda.**

**Please make sure to place the completed survey in a separate envelope from the signed consent form.**

This section to be completed by the research team.

Survey Code     

Date               

|   |                                                                                                  |                                                                                                                                                                                                                                                                                     |
|---|--------------------------------------------------------------------------------------------------|-------------------------------------------------------------------------------------------------------------------------------------------------------------------------------------------------------------------------------------------------------------------------------------|
| 1 | How old are you?                                                                                 | <input type="text"/> <input type="text"/> years                                                                                                                                                                                                                                     |
| 2 | What is your gender?                                                                             | <input type="checkbox"/> Female <input type="checkbox"/> Male                                                                                                                                                                                                                       |
| 3 | What is your occupation?                                                                         | <input type="checkbox"/> Midwife (A1) <input type="checkbox"/> Doctor (generalist)<br><input type="checkbox"/> Nurse (A1) <input type="checkbox"/> Doctor (specialist)<br><input type="checkbox"/> Nurse (A2) <input type="checkbox"/> Other<br><input type="checkbox"/> Nurse (A3) |
| 4 | Which of the following types of health care services are you involved in? [MARK ALL THAT APPLY.] | <input type="checkbox"/> Family planning <input type="checkbox"/> Postnatal care<br><input type="checkbox"/> Antenatal care <input type="checkbox"/> Other service<br><input type="checkbox"/> Labor/delivery                                                                       |

**Mark whether you strongly agree, agree, disagree, or strongly disagree with each of the statements below.**

|   |                                                                                    |                                                                                                                                                        |
|---|------------------------------------------------------------------------------------|--------------------------------------------------------------------------------------------------------------------------------------------------------|
| 5 | A woman's most important role is to take care of her home and cook for her family. | <input type="checkbox"/> Strongly agree <input type="checkbox"/> Disagree<br><input type="checkbox"/> Agree <input type="checkbox"/> Strongly disagree |
|---|------------------------------------------------------------------------------------|--------------------------------------------------------------------------------------------------------------------------------------------------------|

|    |                                                                                                 |                                                                           |                                                                                 |
|----|-------------------------------------------------------------------------------------------------|---------------------------------------------------------------------------|---------------------------------------------------------------------------------|
| 6  | It is natural and right that men have more power than women.                                    | <input type="checkbox"/> Strongly agree<br><input type="checkbox"/> Agree | <input type="checkbox"/> Disagree<br><input type="checkbox"/> Strongly disagree |
| 7  | It is a woman's responsibility to avoid getting pregnant.                                       | <input type="checkbox"/> Strongly agree<br><input type="checkbox"/> Agree | <input type="checkbox"/> Disagree<br><input type="checkbox"/> Strongly disagree |
| 8  | A man should have the final word about decisions in his home.                                   | <input type="checkbox"/> Strongly agree<br><input type="checkbox"/> Agree | <input type="checkbox"/> Disagree<br><input type="checkbox"/> Strongly disagree |
| 9  | There are times when a woman deserves to be beaten.                                             | <input type="checkbox"/> Strongly agree<br><input type="checkbox"/> Agree | <input type="checkbox"/> Disagree<br><input type="checkbox"/> Strongly disagree |
| 10 | Men are better at making decisions than women are.                                              | <input type="checkbox"/> Strongly agree<br><input type="checkbox"/> Agree | <input type="checkbox"/> Disagree<br><input type="checkbox"/> Strongly disagree |
| 11 | Women should remain virgins until they get married.                                             | <input type="checkbox"/> Strongly agree<br><input type="checkbox"/> Agree | <input type="checkbox"/> Disagree<br><input type="checkbox"/> Strongly disagree |
| 12 | Men should be as involved in caring for their children as women are.                            | <input type="checkbox"/> Strongly agree<br><input type="checkbox"/> Agree | <input type="checkbox"/> Disagree<br><input type="checkbox"/> Strongly disagree |
| 13 | A woman should not use a family planning method unless her partner agrees.                      | <input type="checkbox"/> Strongly agree<br><input type="checkbox"/> Agree | <input type="checkbox"/> Disagree<br><input type="checkbox"/> Strongly disagree |
| 14 | A woman who uses contraceptives without telling her husband deserves to be beaten.              | <input type="checkbox"/> Strongly agree<br><input type="checkbox"/> Agree | <input type="checkbox"/> Disagree<br><input type="checkbox"/> Strongly disagree |
| 15 | A woman who has not undergone <i>gukuna imishimo</i> does not deserve respect from her husband. | <input type="checkbox"/> Strongly agree<br><input type="checkbox"/> Agree | <input type="checkbox"/> Disagree<br><input type="checkbox"/> Strongly disagree |
| 16 | Adolescents seeking contraceptives should be advised to abstain from sex.                       | <input type="checkbox"/> Strongly agree<br><input type="checkbox"/> Agree | <input type="checkbox"/> Disagree<br><input type="checkbox"/> Strongly disagree |
| 17 | Male health providers have more power and are more respected than female health care providers. | <input type="checkbox"/> Strongly agree<br><input type="checkbox"/> Agree | <input type="checkbox"/> Disagree<br><input type="checkbox"/> Strongly disagree |

|    |                                                                                                                         |                                                                           |                                                                                 |
|----|-------------------------------------------------------------------------------------------------------------------------|---------------------------------------------------------------------------|---------------------------------------------------------------------------------|
| 18 | A girl who gets pregnant before marriage deserves to be shunned, sent away, or otherwise punished.                      | <input type="checkbox"/> Strongly agree<br><input type="checkbox"/> Agree | <input type="checkbox"/> Disagree<br><input type="checkbox"/> Strongly disagree |
| 19 | A good client never questions a health provider's decisions, even if s/he disagrees with them.                          | <input type="checkbox"/> Strongly agree<br><input type="checkbox"/> Agree | <input type="checkbox"/> Disagree<br><input type="checkbox"/> Strongly disagree |
| 20 | A woman should be able to use contraceptives, even if her partner disagrees.                                            | <input type="checkbox"/> Strongly agree<br><input type="checkbox"/> Agree | <input type="checkbox"/> Disagree<br><input type="checkbox"/> Strongly disagree |
| 21 | Health providers should show sympathy and care to women during childbirth.                                              | <input type="checkbox"/> Strongly agree<br><input type="checkbox"/> Agree | <input type="checkbox"/> Disagree<br><input type="checkbox"/> Strongly disagree |
| 22 | It is better for a health provider to be decisive than to explain everything to a client/patient.                       | <input type="checkbox"/> Strongly agree<br><input type="checkbox"/> Agree | <input type="checkbox"/> Disagree<br><input type="checkbox"/> Strongly disagree |
| 23 | It's easier to work with women when they come to ANC with their partners.                                               | <input type="checkbox"/> Strongly agree<br><input type="checkbox"/> Agree | <input type="checkbox"/> Disagree<br><input type="checkbox"/> Strongly disagree |
| 24 | A woman should be allowed to have a companion present at delivery, if she chooses, and without any further explanation. | <input type="checkbox"/> Strongly agree<br><input type="checkbox"/> Agree | <input type="checkbox"/> Disagree<br><input type="checkbox"/> Strongly disagree |
| 25 | It is important for health care providers assert their power over their clients in order to be respected.               | <input type="checkbox"/> Strongly agree<br><input type="checkbox"/> Agree | <input type="checkbox"/> Disagree<br><input type="checkbox"/> Strongly disagree |
| 26 | When health providers listen to their clients/patients' questions and concerns it results in better service provision.  | <input type="checkbox"/> Strongly agree<br><input type="checkbox"/> Agree | <input type="checkbox"/> Disagree<br><input type="checkbox"/> Strongly disagree |
| 27 | Sometimes you have to yell or shout at a woman while she is giving birth to get her to push.                            | <input type="checkbox"/> Strongly agree<br><input type="checkbox"/> Agree | <input type="checkbox"/> Disagree<br><input type="checkbox"/> Strongly disagree |
| 28 | Men should not be present when women are giving birth.                                                                  | <input type="checkbox"/> Strongly agree<br><input type="checkbox"/> Agree | <input type="checkbox"/> Disagree<br><input type="checkbox"/> Strongly disagree |
| 29 | Sometimes women need a little push or slap to motivate them during childbirth.                                          | <input type="checkbox"/> Strongly agree<br><input type="checkbox"/> Agree | <input type="checkbox"/> Disagree<br><input type="checkbox"/> Strongly disagree |

|    |                                                                                                                              |                                                                           |                                                                                 |
|----|------------------------------------------------------------------------------------------------------------------------------|---------------------------------------------------------------------------|---------------------------------------------------------------------------------|
| 30 | A good woman keeps quiet during delivery, even when she is in pain.                                                          | <input type="checkbox"/> Strongly agree<br><input type="checkbox"/> Agree | <input type="checkbox"/> Disagree<br><input type="checkbox"/> Strongly disagree |
| 31 | A woman should be able to get help from a skilled birth attendant when she needs it, even without her husband's approval.    | <input type="checkbox"/> Strongly agree<br><input type="checkbox"/> Agree | <input type="checkbox"/> Disagree<br><input type="checkbox"/> Strongly disagree |
| 32 | If a woman is unable to pay for the services she has received, she should be detained in the facility until payment is made. | <input type="checkbox"/> Strongly agree<br><input type="checkbox"/> Agree | <input type="checkbox"/> Disagree<br><input type="checkbox"/> Strongly disagree |
